# Supplementary material for: Glyco-conjugate as selective switch-on molecule for Hg2+in the presence of albumin proteins, blood serum milieu and on silica gel solid support
Source: Royal Society of Chemistry journal article supplement (doi:10.1039/c4ra00223g), 2014-03-12
Supplement: c4ra00223g1.pdf [file c4ra00223g1.pdf]

## Electronic Supporting Information

### Glyco-conjugate as selective *switch on molecule* for Hg<sup>2+</sup> in the presence of albumin proteins, blood serum *milieu* and on silica gel solid support

*Sivaiah Areti, Deepthi S. Yarramala, Kushal Samanta, Vijaya Kumar Hinge, Jayshree Khedkar, and Chebrolu Pulla Rao\**

Bioinorganic Laboratory, Department of Chemistry, Indian Institute of Technology Bombay, Powai, Mumbai 400 076, India. E-mail: [cp Rao@iitb.ac.in](mailto:cp Rao@iitb.ac.in)

### Contents

|                                                                                                                                         |    |
|-----------------------------------------------------------------------------------------------------------------------------------------|----|
| <b>S01.</b> Synthesis of <b>L<sub>S</sub></b> and <b>L<sub>O</sub></b>                                                                  | 2  |
| <b>S02.</b> <sup>1</sup> H NMR, <sup>13</sup> C NMR and HRMS spectra of <b>L<sub>S</sub></b>                                            | 4  |
| <b>S03.</b> <sup>1</sup> H NMR, <sup>13</sup> C NMR and HRMS spectra of <b>L<sub>O</sub></b>                                            | 6  |
| <b>S04.</b> Effect of time and percentages of water on fluorescence emission of titration of <b>L<sub>S</sub></b> with Hg <sup>2+</sup> | 6  |
| <b>S05.</b> Fluorescence studies of <b>L<sub>S</sub></b> with metal ions                                                                | 8  |
| <b>S06.</b> Determination of Limit of Detection (LOD) of Hg <sup>2+</sup> by <b>L<sub>S</sub></b>                                       | 9  |
| <b>S07.</b> Fluorescence of [ <b>L<sub>O</sub></b> +Hg <sup>2+</sup> ] as control studies                                               | 9  |
| <b>S08.</b> Colorimetric titration of <b>L<sub>S</sub></b> with metal ions                                                              | 10 |
| <b>S09.</b> Fluorescence studies of [ <b>L<sub>S</sub></b> +Hg <sup>2+</sup> ] with competitive metal ions                              | 10 |
| <b>S10.</b> ESI mass spectrometry of [ <b>L<sub>S</sub></b> +Hg <sup>2+</sup> ]                                                         | 12 |
| <b>S11.</b> Absorption titration of <b>L<sub>S</sub></b> with metal ions                                                                | 13 |
| <b>S12.</b> Association constant and Job's for [ <b>L<sub>S</sub></b> + Hg <sup>2+</sup> ] (absorption)                                 | 14 |
| <b>S13.</b> Absorption titration spectral traces of control molecule ( <b>L<sub>O</sub></b> ) with Hg <sup>2+</sup>                     | 14 |
| <b>S14.</b> <sup>1</sup> H-NMR spectral titrations of <b>L<sub>S</sub></b> with Hg <sup>2+</sup>                                        | 15 |
| <b>S15.</b> <sup>13</sup> C NMR spectral titrations of <b>L<sub>S</sub></b> with Hg <sup>2+</sup>                                       | 15 |
| <b>S16.</b> Fluorescence studies of [ <b>L<sub>S</sub></b> +Hg <sup>2+</sup> ] with albumin proteins                                    | 16 |
| <b>S17.</b> Fluorescence studies carried out in blood serum                                                                             | 17 |
| <b>S18.</b> Computational methodology and cartesian coordinates                                                                         | 18 |

### S01. Synthesis and characterization of $L_S$ and $L_O$

2,3,4,6-O-acetyl-D-glycopyranosyl isothiocyanate derivative have been synthesized according to reported procedure.<sup>Ref\_1</sup>

{Ref\_1: Camarasa, M. J.; Fernandezresa, P.; Garcialopez, M. T. Delasheras, F. G.; Mendezcastrillon, P. P.; Felix, A. S. *Synthesis* **1984**, 509-510}

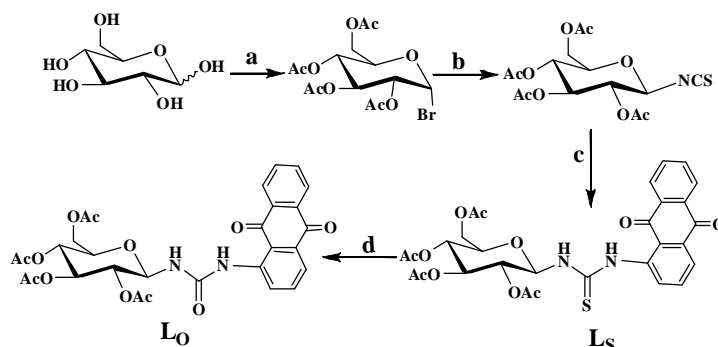

**Scheme 1:** (a) Acetic anhydride, catalytic amount of HClO<sub>4</sub>, HBr 33 % in acetic acid; (b) KSCN, (n-C<sub>4</sub>H<sub>9</sub>)<sub>4</sub>N<sup>+</sup> I<sup>-</sup>, molecular sieves of 4 Å, CH<sub>3</sub>CN, reflux, 3h; (c) 1-AAQ, dry DMF, 50 °C, 6 h; (d) Hg(CH<sub>3</sub>COO)<sub>2</sub>, CH<sub>3</sub>CN, RT, 30 min.

**Synthesis and characterization for  $L_S$ :** 1-Aminoanthraquinone (220 mg, 10.8 mmol) was dissolved in dry DMF and a solution of 2,3,4,6-O-acetyl-D-glycopyranosyl isothiocyanate (375.5 mg, 10.6 mmol) was added to this and stirred under N<sub>2</sub> atmosphere at 50 °C for 6 h. The reaction mixture was cooled to room temperature. After removal of DMF in vacuum, the resulting brown residue was diluted with MeOH. Silica gel was added and the mixture was evaporated to dryness and purified by column chromatography using 2:3 (EtOAc/Pet ether) to get a light yellow powder (66 %) as product. Characterization data for  $L_S$ : IR (KBr); 3412 (b)  $\nu$ (N-H), 3060(S)  $\nu$ (Ar C-H), 2941(S)  $\nu$  (C-H), 1746 (S)  $\nu$  (C=O), 1673 (S)  $\nu$ (ArC=O) 1228 (S)  $\nu$ (C=S) and 1038 (S)  $\nu$  (C-O-C) cm<sup>-1</sup>; <sup>1</sup>H NMR (400 MHz, CDCl<sub>3</sub>): 1.9 – 2.2 (4 CH<sub>3</sub>) C2-H, C3-H, (C4-H, C5-H and C6-H), 5.93-6.05 (d, H, <sup>3</sup>J<sub>C1-H-C2-H</sub> 7.3 Hz, C1-H), 7.81-7.86 (t, 1H, Ar-H, J = 16

Hz), 7.90-7.95 (m, 2H, Ar-Hs), 7.98-8.03 (dd, 1H, Ar-Hs  $J_1 = 6.2$ ,  $J_2 = 6.2$  Hz), 8.15-8.25 (m, 2H, Ar-Hs), 9.85(br-s,NH), 11.58 (br-s,NH) ppm;  $^{13}\text{C NMR}$  (100 MHz,  $\text{CDCl}_3$ ): 20 (4 x C), 82.66 (C1), 61.-73 (C2-C6), 119.50-134.80 (Ar-10C), 170.14 – 171.15 (4C=O), 182, 184 (Ar C=O), 187 (ArN-C), 182.51(C=S) ppm; **Anal. Calculated for**  $\text{C}_{29}\text{H}_{28}\text{N}_2\text{O}_{11}\text{S}\cdot\text{C}_2\text{H}_6\text{NCHO}\cdot\text{H}_2\text{O}$ : Calcd. C, 54.62 % ; H, 4.80 % ; N, 5.97 %; found C, 54.96 %; H, 4.40 %; N, 5.74 %. **ESI MS**:  $m/z$  613 ( $[\text{M}+\text{H}]^+$ , 100%).

**Synthesis and characterization for  $\text{L}_0$** : 2,3,4,6-O-acetyl glucopyranosyl conjugate of anthraquinone linked through thiourea ( $\text{L}_s$ ) (300 mg, 0.5 mmol) was dissolved in acetonitrile and to this a solution of  $\text{Hg}(\text{CH}_3\text{COO})_2$  (10.6 mmol) was added and stirred at room temperature for 30 min. After removal of acetonitrile under vacuum, the resulting brown residue was purified by column chromatography using 2:3 (ethyl acetate/pet ether) to get the product (76 %) as yellow powder. Characterization data for  $\text{L}_0$  **IR** (KBr); 2923 (S)  $\nu_{(\text{Ar C-H})}$ , 2851(S)  $\nu$  (C-H), 1758 (S)  $\nu_{(\text{Ar-C=O})}$ , 1526 (S)  $\nu_{(\text{C=O})}$  and 1035 (S)  $\nu$  (C-O-C)  $\text{cm}^{-1}$ ;  $^1\text{H NMR}$  (400 MHz,  $\text{CDCl}_3$ ): 1.9 – 2.2 (4  $\text{CH}_3$ ) C2-H, C3-H, (C4-H, C5-H and C6-H), 5.93-6.05 (d, H,  $^3\text{JC1-H-C2-H}$  7.3 Hz, C1-H), 6.36 (br-s,NH), 7.20-7.25 (d, Ar-1H ) 7.63-7.61 (d, 1H, Ar-H,  $J = 7.8$  Hz), 7.75-7.77 (m, 2H, Ar-Hs), 7.91-7.49 (d, 1H, Ar-Hs  $J = 8.5$  Hz), 8.20-8.23 (m, 2H, Ar-Hs), 8.90 (b ,Ar-1H), 11.94 (br-s,NH) ppm;  $^{13}\text{C NMR}$  (100MHz,  $\text{CDCl}_3$ ): 20.8-21.1 (4 x C), 82.66 (C1), 73 .3, 73.2, 70.7, 68.2, (C2-C6), 121.50, 125.3, 127.6, 127.5, 132.4, 133.2, 134.4, 135.7, 143.2.(Ar-10C), 169.8, 17.2, 170.8, 171.15 (4C=O), 182, 184.2 (Ar C=O), 187.5 (ArN-C), 154.51(C=O) ppm; **Anal. Calculated for**  $\text{C}_{29}\text{H}_{28}\text{N}_2\text{O}_{12}\cdot\frac{1}{2}\text{H}_2\text{O}$ : Calcd. C, 58.39 %; H, 4.73 %; N, 4.70% ; found C, 57.71 %; H, 4.65 %; N, 5.28 %. **ESI MS**:  $m/z$  597.1 ( $[\text{M}+\text{H}]^+$ , 100%)

## S02. Characterization of L<sub>5</sub>.

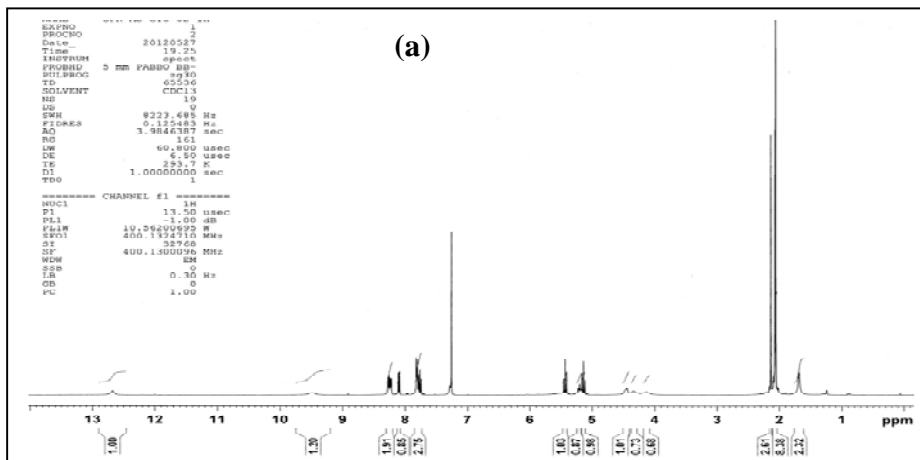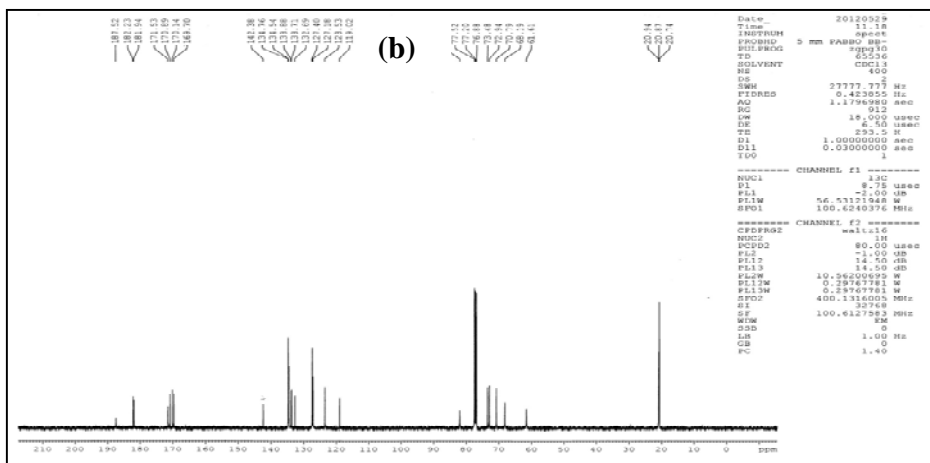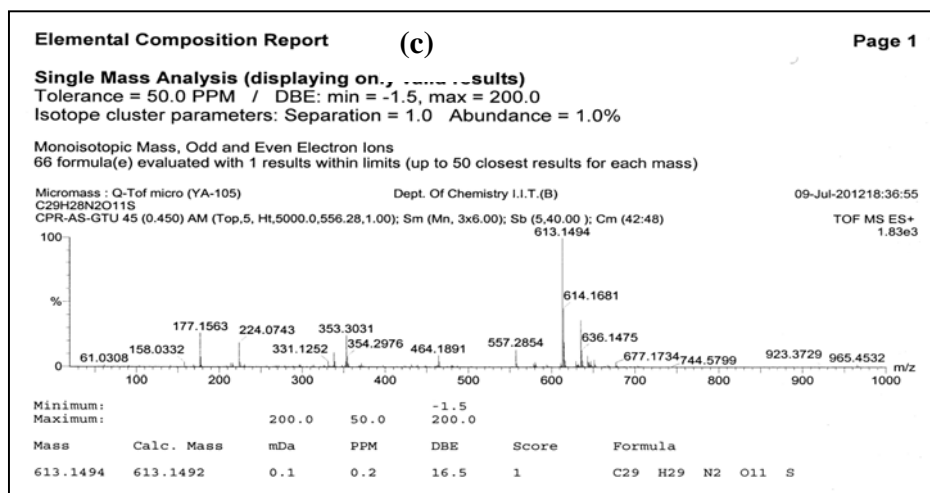

Continued

**Eager 300 Report (d)**

✓Page: 1 Sample: AS-GTUAQ (AS-GTUAQ)

Method Name : CPR010113  
Method File : D:\CHNS2012\CPR010113.mth  
Chromatogram : AS-GTUAQ  
Operator ID : ANITA Company Name : C.E. Instruments  
Analysed : 01/01/2013 14:47 Printed : 3/29/2013 22:02  
Sample ID : AS-GTUAQ (# 6) Instrument N. : Instrument #1  
Analysis Type : UnkNown (Area) Sample weight : .657

Calib. method : using 'K Factors'

!!! Warning missing one or more peaks.

| Element Name | %       | Ret.Time | Area    | BC | Area ratio | K factor    |
|--------------|---------|----------|---------|----|------------|-------------|
| Nitrogen     | 5.7481  | 44       | 59959   | RS | 16.181200  | .158768E+07 |
| Carbon       | 54.9689 | 68       | 970209  | RS | 1.000000   | .268064E+07 |
| Hydrogen     | 4.4027  | 184      | 205116  | RS | 4.730048   | .648070E+07 |
| Totals       | 65.1197 |          | 1235284 |    |            |             |

**Figure S02:** (a)  $^1\text{H}$  NMR in  $\text{CDCl}_3$  (b)  $^{13}\text{C}$  NMR in  $\text{CDCl}_3$  (c) HRMS (d) Elemental analysis report for  $\text{L}_s$

### S03. Characterization of L<sub>0</sub>

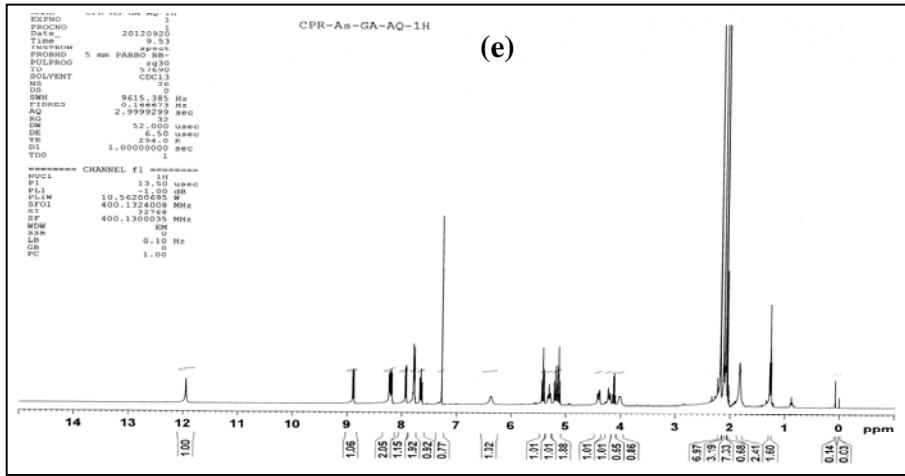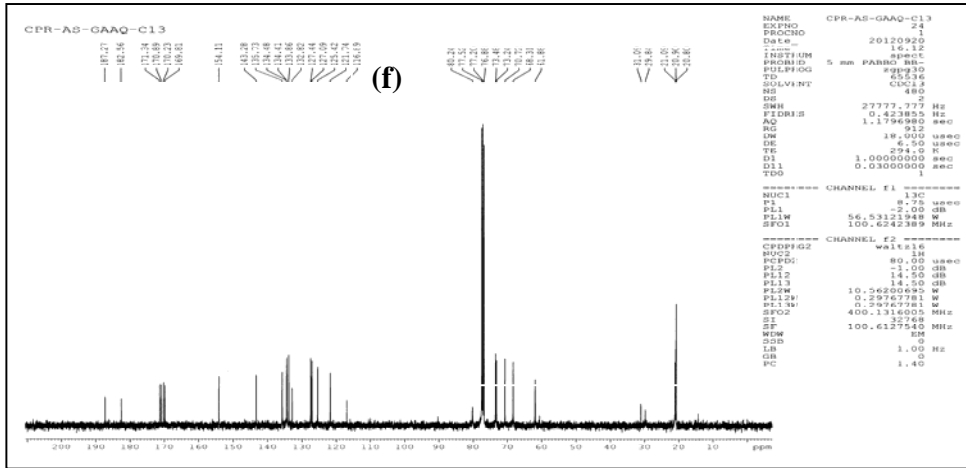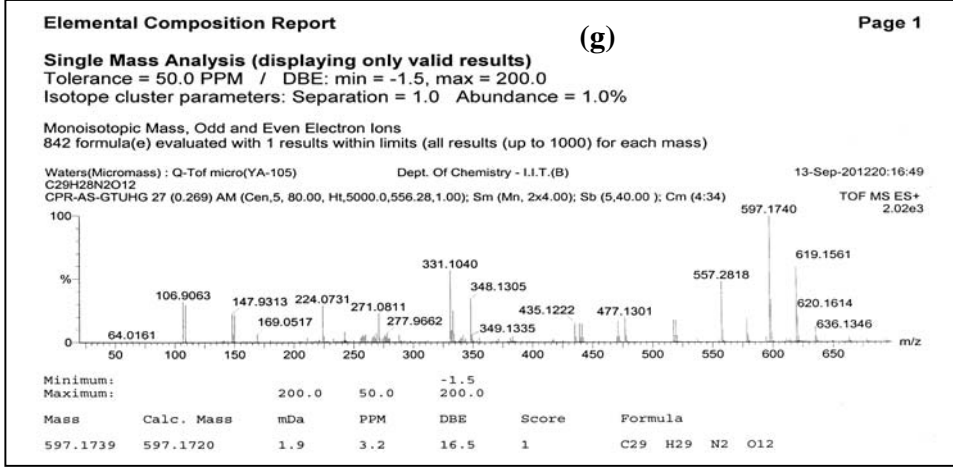

**Eager 300 Report (h)**

Page: 1 Sample: AS-GAAQ (AS-GAAQ)

Method Name : CPR010113  
 Method File : D:\CHNS2012\CPR010113.mth  
 Chromatogram : AS-GAAQ  
 Operator ID : ANITA  
 Analysed : 01/01/2013 14:58  
 Sample ID : AS-GAAQ (# 7)  
 Analysis Type : UnkNown (Area)

Company Name : C.E. Instruments  
 Printed : 3/29/2013 22:02  
 Instrument N. : Instrument #1  
 Sample weight : .805

Calib. method : using 'K Factors'

!!! Warning missing one or more peaks.

| Element Name | %       | Ret.Time | Area    | BC | Area ratio | K factor    |
|--------------|---------|----------|---------|----|------------|-------------|
| Nitrogen     | 5.2869  | 44       | 67571   | RS | 18.464130  | .158768E+07 |
| Carbon       | 57.7193 | 67       | 1247640 | RS | 1.000000   | .268064E+07 |
| Hydrogen     | 4.6543  | 178      | 260469  | RS | 4.789975   | .648070E+07 |
| Totals       | 67.6605 |          | 1575680 |    |            |             |

**Figure S03:** (e)  $^1\text{H}$  NMR in  $\text{CDCl}_3$  (f)  $^{13}\text{C}$  NMR in  $\text{CDCl}_3$  (g) HRMS (h) Elemental analysis report of  $\text{L}_\text{O}$

**S04.** Effect of time on fluorescence emission of titration of  $\text{L}_\text{S}$  with  $\text{Hg}^{2+}$

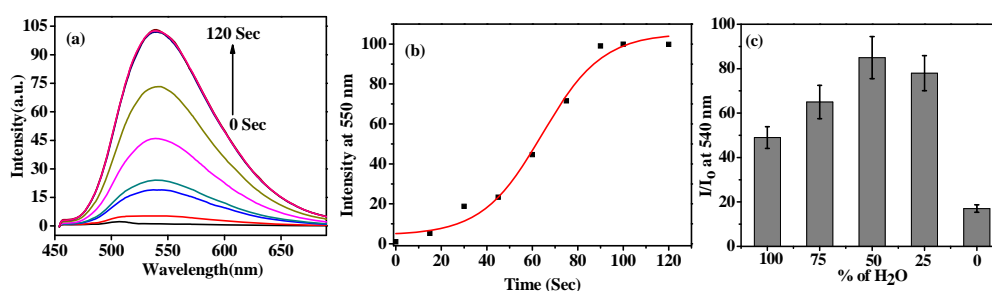

**Figure 4.** Effect of time on fluorescence emission of titration of  $\text{L}_\text{S}$  ( $5 \mu\text{M}$ ) with  $\text{Hg}^{2+}$  ( $20 \mu\text{M}$ ) ( $\lambda_{\text{ex}} = 430 \text{ nm}$ ). (b) Fluorescence emission intensity as function time at 540 nm. (c) Bar diagram showing relative fluorescence intensity in the titration of  $\text{L}_\text{S}$  ( $5 \mu\text{M}$ ) with  $\text{Hg}^{2+}$  ( $\lambda_{\text{ex}} = 430 \text{ nm}$ ) in a mixture having different percentages of water and acetonitrile.

### S05. Fluorescence spectra for the titration of $L_S$ with metal ions

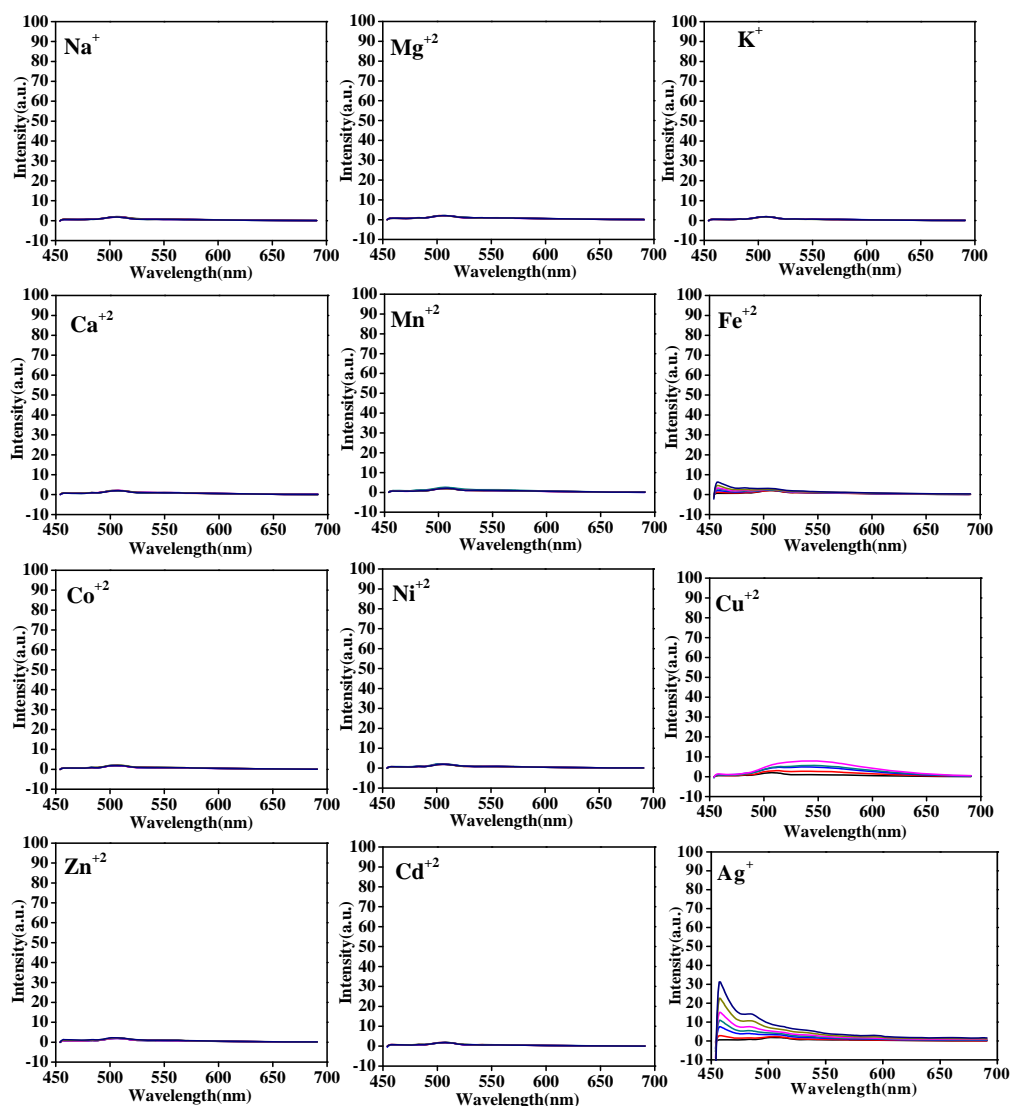

**Figure S05:** Fluorescence spectra for the titration of  $L_S$  (5  $\mu$ M) with different metal ions in *HEPES-buffer* medium;  $\lambda_{ex} = 430$  nm



### S06. Determination of Limit of Detection (LOD) of $\text{Hg}^{2+}$ by $\text{L}_\text{S}$

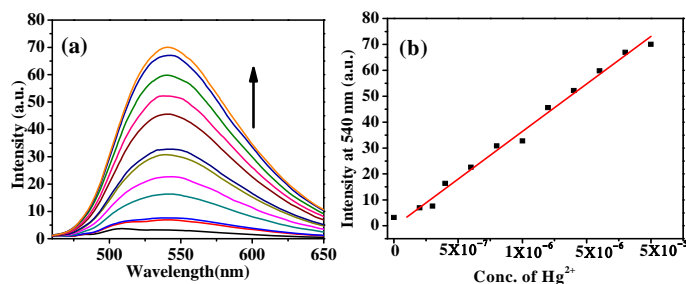

**Figure S06:** (a) Fluorescence spectral traces of  $\text{L}_\text{S}$  during titration with  $\text{Hg}^{2+}$  to determine LOD. (b) The linear dynamic fluorescence response for the titration of  $\text{L}_\text{S}$  with  $\text{Hg}^{2+}$  to determine the detection limit (LOD). The LOD was derived by using the formula  $3\sigma/k$  where  $\sigma$  = standard deviation of the blank (10 blank samples) and  $k$  = is the slope of linear calibration curve.

### S07. Fluorescence of $[\text{L}_\text{O} + \text{Hg}^{2+}]$ as control studies

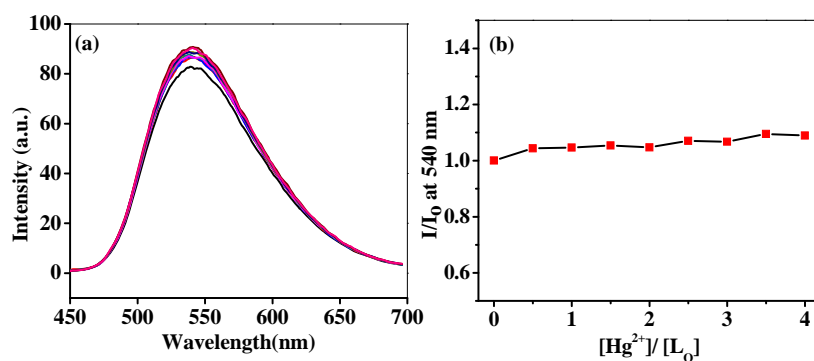

**Figure S07:** (a) Fluorescence titration spectral traces of control molecules  $\text{L}_\text{O}$  ( $5\mu\text{M}$ ,  $\lambda_{\text{ex}} = 420\text{ nm}$ ) with  $\text{Hg}^{2+}$ ; (b) Plot of fluorescence intensity at 540 nm as a function of added  $[\text{Hg}^{2+}]$  at varying mole ratios.

### S08: Colorimetric titration of $L_S$ with metal ions

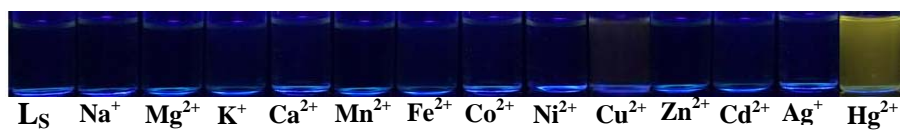

**Figure S08:** Colorimetric titration of  $L_S$  (20  $\mu\text{M}$ ) with different metal ions (4 equiv.  $M^{n+}$ ) in *HEPES* buffer under UV-light (365nm).

### S9. Fluorescence studies of $[L_S + \text{Hg}^{2+}]$ with competitive metal ions

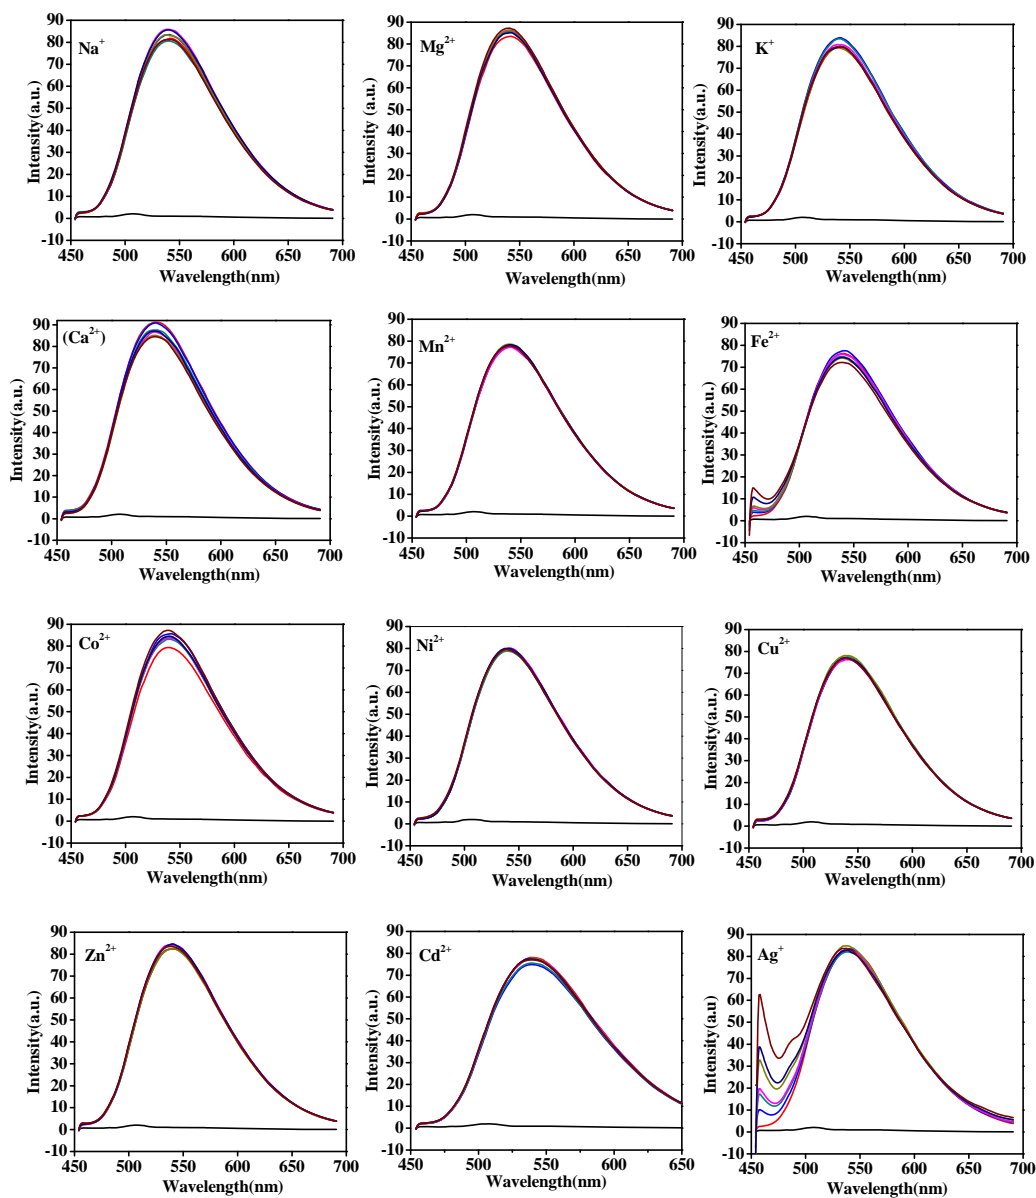

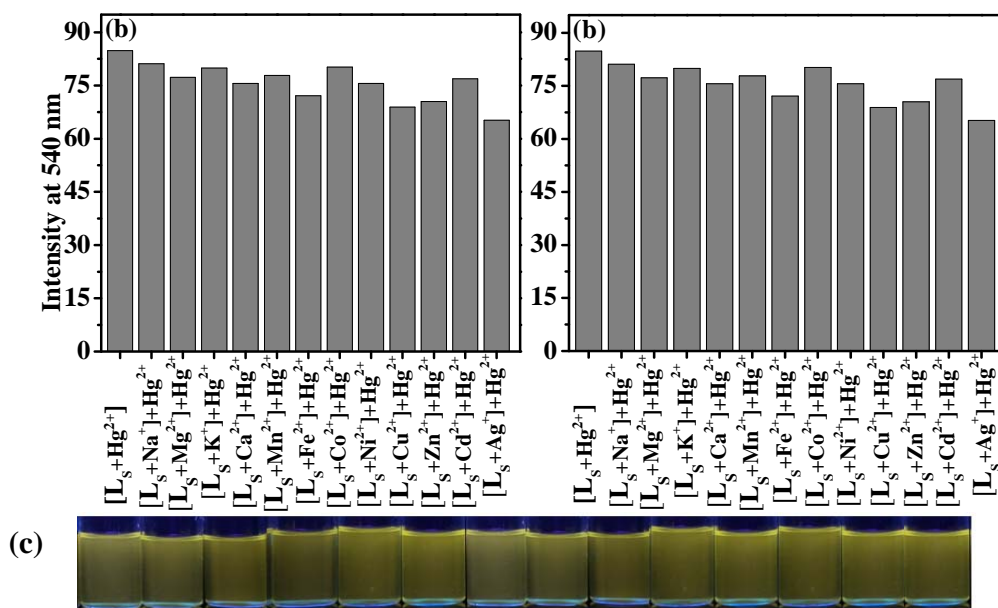

**Figure S9:** Histograms showing the competitive fluorescence titration responses of  $L_S$  (5  $\mu M$ ) with  $Hg^{2+}$  in *HEPES* buffer in presence of competitive metal ions (10  $\mu M$ ); (a)  $[L_S + 3$  equiv.  $Hg^{2+}]$  by 20 equiv.  $M^{n+}$ , (b)  $[L_S + 20$  equiv.  $M^{n+}]$  by  $Hg^{2+}$ . (c) Colorimetric titration of  $L_S$  (20  $\mu M$ ) with  $Hg^{2+}$  in the presence of competitive metal ions (20  $\mu M$ ),  $[L_S + 20$  equiv.  $M^{n+}]$  by 3 equiv.  $Hg^{2+}$  under UV-light (365 nm).

## S10. ESI mass spectrometry of $[L_S+Hg^{2+}]$ complex

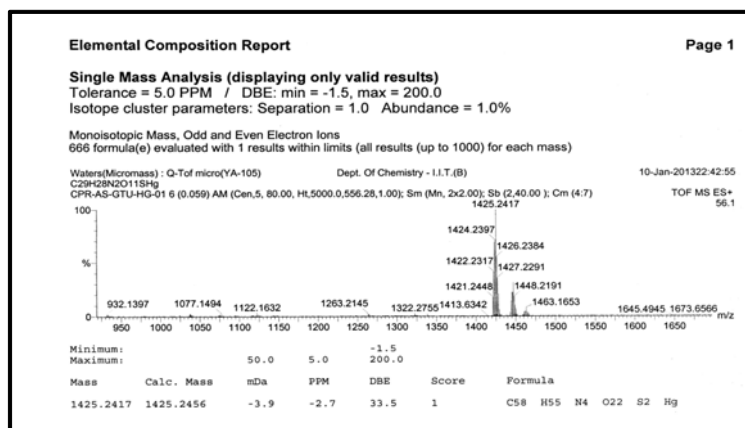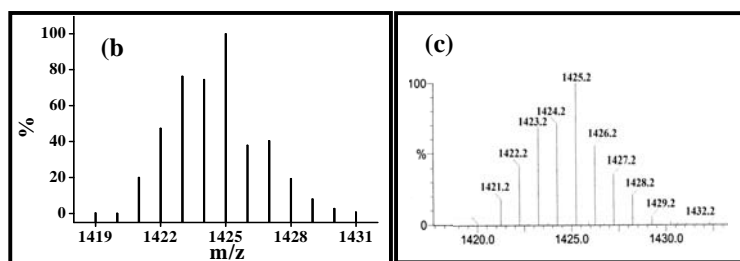

**Figure S10:** (a) The titration of  $L_S$  by  $Hg^{2+}$  was monitored by ESI-MS mass spectrum showing the molecular ion peak for the 1:2 complex formed between  $Hg^{2+}$  and  $L_S$ . (b) Calculated isotopic peak pattern, (c) Observed isotopic peak pattern.

### S11. Absorption titration spectra of $L_S$ with other metal ions

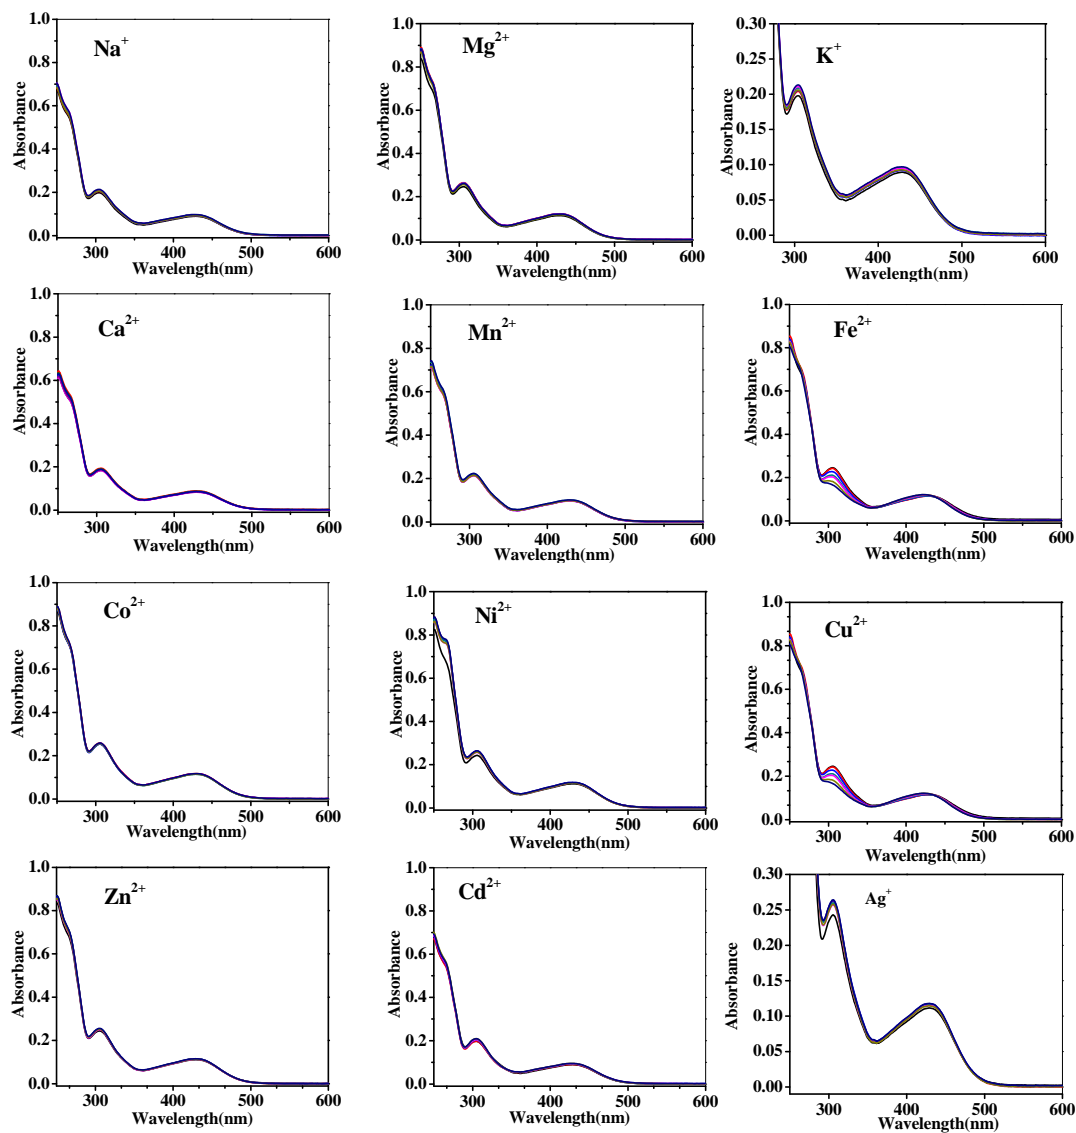

**Figure S11:** UV-Visible spectral traces obtained during the titration of  $L$  (10  $\mu$ M) with different metal ions

**S12. Association constant and Job's for  $[L_S + Hg^{2+}]$  (absorption)**

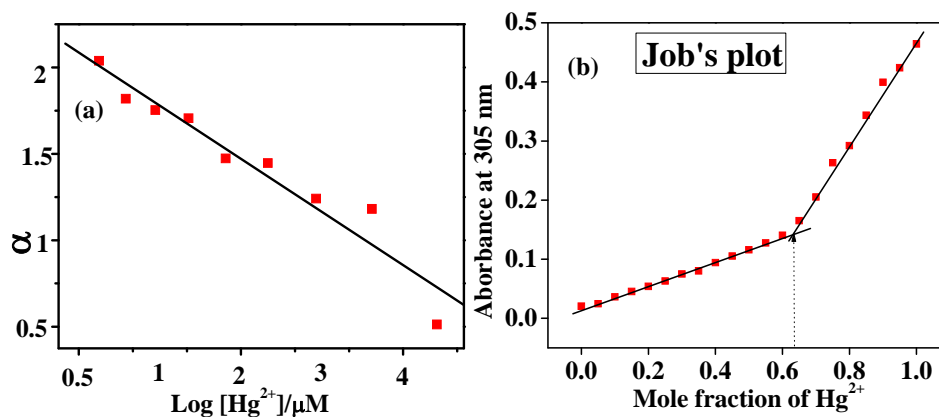

**Figure S12:** (a) Association constant ( $K_a$ ) determined from the absorption data using Benesi-Hildebrand equation; (b) shows Job's plot for the titration carried out between  $L_S$  and  $Hg^{2+}$ .

**S13. Absorption titration spectral traces of control molecule ( $L_O$ ) with  $Hg^{2+}$**

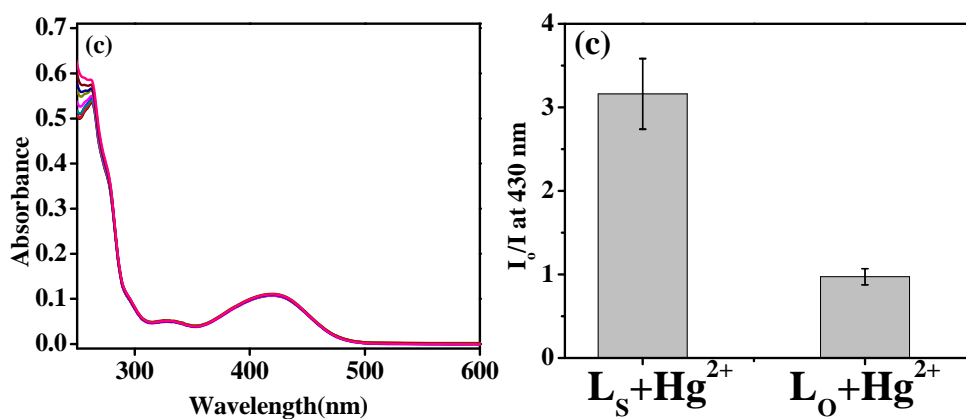

**Figure S13:** UV-Visible spectral traces obtained during the titration of  $L_O$  ( $10\mu\text{M}$ ) with  $Hg^{2+}$ .

**S14:  $^1\text{H}$ -NMR spectral titrations of  $\text{L}_\text{S}$  with  $\text{Hg}^{2+}$**

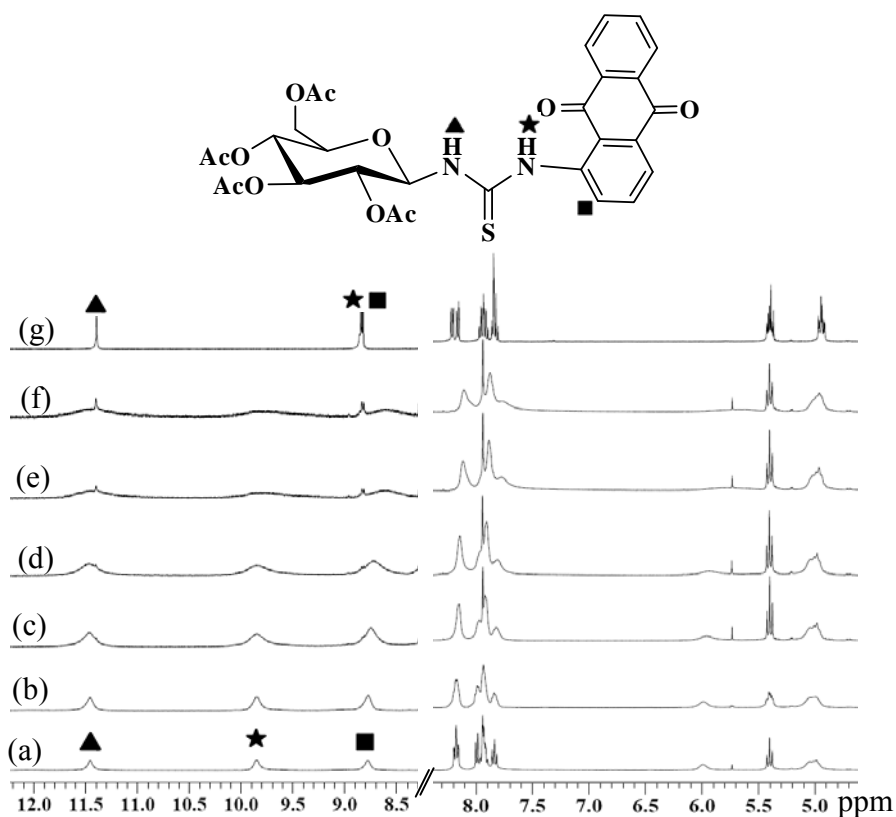

**Figure S14:**  $^1\text{H}$  NMR spectral titration of  $\text{L}_\text{S}$  (5 mM) with varying number of equivalents of  $\text{Hg}^{2+}$  in  $\text{DMOS-d}_6$ : (a) 0.0; (b) 0.25; (c) 0.5; (d) 1.0; (e) 1.5 and (f) 2.0. (g) Spectrum of  $\text{L}_\text{O}$  that is synthesized separately.

**S15:  $^{13}\text{C}$  NMR spectral titrations of  $\text{L}_\text{S}$  with  $\text{Hg}^{2+}$**

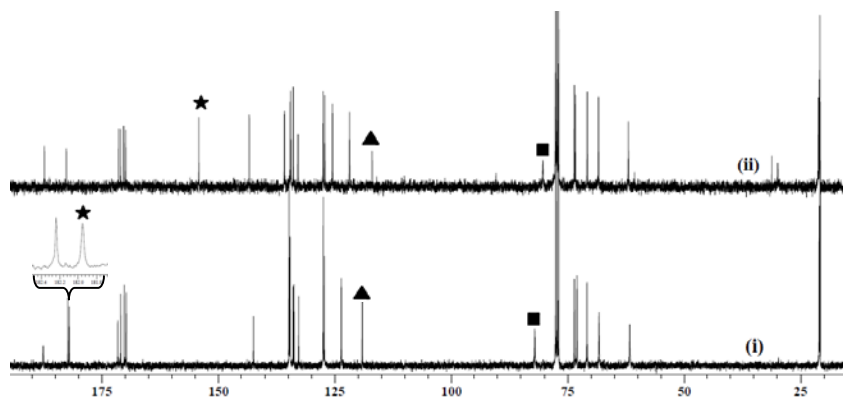

**Figure S15:**  $^{13}\text{C}$  NMR spectra measured during the titration of  $\text{L}_\text{S}$  with  $\text{Hg}^{2+}$ ,  $\text{CDCl}_3$ . (i)  $\text{L}_\text{S}$  and (ii)  $\text{L}_\text{S} + \text{Hg}^{2+}$ ; where '★' is for C=S; '▲' is for aromatic carbon; and '■' is for the anomeric carbon.

## S16. Fluorescence studies of $[L_S + Hg^{2+}]$ with albumin proteins

*Safety considerations:* We have always adopted the safe laboratory practices, such as, the use of apron, safety glasses, gloves and avoided any direct contact with these salts and their solutions. Further, it should be noted that the concentrations that we used were very low (50  $\mu$ M) in all the titrations. The titrated solutions were initially treated with  $Na_2S$  followed by adding 0.1N  $HNO_3$ , before these are being disposed.

Biological applicability of  $L_S$  to sense  $Hg^{2+}$  has been addressed by carrying out fluorescence titrations using human blood serum, as well as related albumin proteins, e.g., human serum albumin (HSA), bovine serum albumin (BSA) and  $\alpha$ -lactalbumin (LA). The serum samples were prepared by dissolving 5 mg of albumin proteins in 1 mL ( $\sim 75$   $\mu$ M) of HEPES buffer. Blood serum samples were collected from (IIT Hospital, Powai) a healthy volunteer after fasting. The blood sample was allowed to clot and serum was obtained *via* centrifugation. The serum samples were kept at  $-4$   $^{\circ}C$  for storage. 1 mL of serum was dissolved in 2 mL of HEPES buffer and used as stock solution.

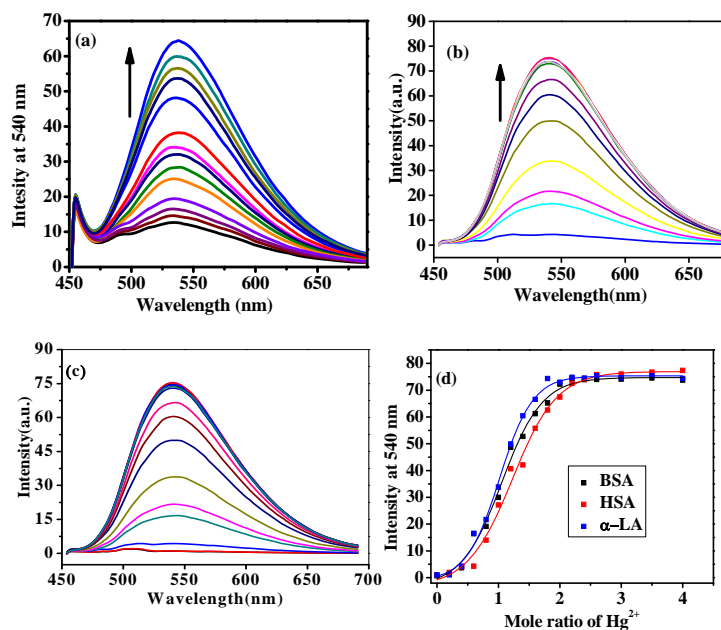

**Figure S16:** (a) Fluorescence response of  $L_S$  (5  $\mu$ M,  $\lambda_{ex}$  = 430 nm) in albumin protein with  $Hg^{2+}$  in HEPES buffer: (a)  $\{L_S + BSA\}$  by  $Hg^{2+}$ , (b)  $\{L_S + HSA\}$  by  $Hg^{2+}$ , (c)  $\{L_S + \alpha$ -LA  $\} + Hg^{2+}$ , (d) Fluorescence response of  $L_S$  with  $Hg^{2+}$  at 540 nm response of  $[L_S + 200$   $\mu$ L of albumin proteins] followed by titration against  $Hg^{2+}$ .



### S17. Fluorescence studies carried out in blood serum

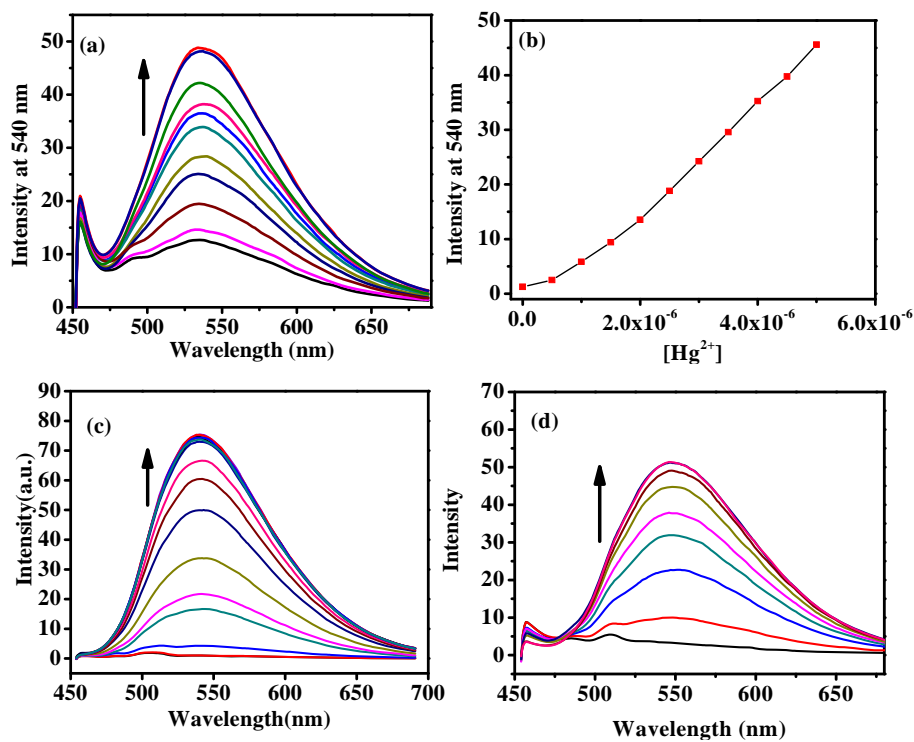

**Figure S17.** (a) Fluorescence response of  $L_S$  (5  $\mu\text{M}$ ,  $\lambda_{\text{ex}} = 430$  nm) in presence of blood serum [ $\{L_S + 250 \mu\text{L}\} + \text{Hg}^{2+}$ ], (b) The detection limit of  $L_S$  for  $\text{Hg}^{2+}$ , in presence of blood serum. (c) Competitive fluorescence titration responses of  $L_S$  (5  $\mu\text{M}$ ) with  $\text{Hg}^{2+}$  in HEPES buffer in presence of competitive metal ion ( $\text{Na}^+$ ), [ $L_S + 200\text{mM}$  of  $\text{Na}^+$ ], (d) Fluorescence response of  $L_S$  with  $\text{Hg}^{2+}$  in HEPES buffer pH at 5.5.

### **S18. Computational methodology and coordinates**

The  $L_S$  and its complexes, viz.,  $[(L_S^-)_2Hg^{2+}]$  were studied by DFT using Gaussian 09 package<sup>2</sup> with B3LYP/LANL2DZ theory. Before the optimization,  $L_S$  is converted to  $L_S^-$  by removing the proton from the “NH” of thiourea and the resultant anionic species were used for the complexation. The optimized  $L_S^-$  was considered for the complexation with  $Hg^{2+}$ . The  $Hg^{2+}$  placed between the two  $L_S^-$  with distance of 6 Å such a way that  $Hg^{2+}$  can interact with thiourea moiety of  $L_S^-$ . The Cartesian coordinates of optimized structure were given below.

2: Gaussian 09, M. J. Frisch, G. W. Trucks, H. B. Schlegel, G. E. Scuseria, M. A. Robb, J. R. Cheeseman, G. Scalmani, V. Barone, B. Mennucci, G. A. Petersson, H. Nakatsuji, M. Caricato, X. Li, H. P. Hratchian, A. F. Izmaylov, J. Bloino, G. Zheng, J. L. Sonnenberg, M. Hada, M. Ehara, K. Toyota, R. Fukuda, J. Hasegawa, M. Ishida, T. Nakajima, Y. Honda, O. Kitao, H. Nakai, T. Vreven, J. A. Montgomery, Jr., J. E. Peralta, F. Ogliaro, M. Bearpark, J. J. Heyd, E. Brothers, K. N. Kudin, V. N. Staroverov, R. Kobayashi, J. Normand, K. Raghavachari, A. Rendell, J. C. Burant, S. S. Iyengar, J. Tomasi, M. Cossi, N. Rega, J. M. Millam, M. Klene, J. E. Knox, J. B. Cross, V. Bakken, C. Adamo, J. Jaramillo, R. Gomperts, R. E. Stratmann, O. Yazyev, A. J. Austin, R. Cammi, C. Pomelli, J. W. Ochterski, R. L. Martin, K. Morokuma, V. G. Zakrzewski, G. A. Voth, P. Salvador, J. J. Dannenberg, S. Dapprich, A. D. Daniels, Ö. Farkas, J. B. Foresman, J. V. Ortiz, J. Cioslowski, and D. J. Fox, Gaussian, Inc., Wallingford CT, 2009.

Coordinates of B3LYP/LANL2DZ optimized structure of  $L_s^-$

| Z  | Coordinates |          |          | Z | Coordinates |          |          |
|----|-------------|----------|----------|---|-------------|----------|----------|
|    | x           |          | x        |   | x           |          | x        |
| 6  | -3.38226    | -1.10161 | 1.024174 | 8 | 3.36099     | -1.45357 | -0.10615 |
| 6  | -1.92472    | -0.74344 | 0.73053  | 8 | 7.782049    | 1.745353 | 0.126809 |
| 6  | -1.67647    | -0.19075 | -0.68988 | 1 | -3.47331    | -1.30965 | 2.092439 |
| 8  | -2.59432    | 0.980057 | -0.82851 | 1 | -1.65791    | 0.080476 | 1.402883 |
| 6  | -4.03124    | 0.699379 | -0.71522 | 1 | -3.90552    | 0.925779 | 1.385458 |
| 6  | -4.23819    | 0.13654  | 0.707254 | 1 | -1.94841    | -0.9168  | -1.45241 |
| 8  | -0.98138    | -1.78498 | 1.165994 | 1 | -5.80248    | 1.949676 | -0.83685 |
| 8  | -3.88395    | -2.39624 | 0.487311 | 1 | -4.45916    | 2.441454 | -1.91522 |
| 8  | -5.62769    | -0.09534 | 1.174865 | 1 | -4.34883    | -0.01014 | -1.47828 |
| 6  | -4.71873    | 2.038318 | -0.93454 | 1 | 0.096792    | -0.16859 | -1.76703 |
| 8  | -4.26197    | 2.977765 | 0.099924 | 1 | -3.26343    | -4.80406 | -0.77866 |
| 7  | -0.33128    | 0.196653 | -0.92616 | 1 | -4.65715    | -4.54014 | -1.85533 |
| 6  | -3.9485     | -2.80934 | -0.83227 | 1 | -4.88199    | -4.59686 | -0.07418 |
| 8  | -3.79779    | -2.08828 | -1.81789 | 1 | -2.24795    | 5.524686 | 0.651029 |
| 6  | -4.22294    | -4.28595 | -0.88723 | 1 | -1.79344    | 3.838681 | 1.038406 |
| 6  | -3.42094    | 4.013612 | -0.29227 | 1 | -3.24324    | 4.542423 | 1.780501 |
| 8  | -3.35115    | 4.410935 | -1.45803 | 1 | -8.10372    | -0.03656 | 1.848789 |
| 6  | -2.63587    | 4.529109 | 0.87195  | 1 | -7.58917    | -1.7163  | 2.019334 |
| 6  | -6.62428    | -0.66518 | 0.423705 | 1 | -8.66095    | -1.2609  | 0.664423 |
| 8  | -6.5537     | -0.90431 | -0.7855  | 1 | 1.574092    | -2.69595 | 0.570609 |
| 6  | -7.82879    | -0.93543 | 1.289421 | 1 | 0.925197    | -4.35734 | 0.468742 |
| 6  | -0.53332    | -2.80478 | 0.35738  | 1 | 0.749595    | -3.38943 | 1.97415  |
| 8  | -1.11278    | -3.17586 | -0.67259 | 1 | 9.00528     | -0.39298 | 0.131464 |
| 6  | 0.755691    | -3.36148 | 0.882036 | 1 | 6.226847    | 3.578873 | 0.045561 |
| 6  | 0.593155    | 0.888318 | -0.12961 | 1 | 3.993368    | 4.721162 | -0.1112  |
| 7  | 1.820631    | 0.745641 | -0.5854  | 1 | 1.934547    | 3.356202 | -0.33761 |
| 16 | 0.107664    | 1.783523 | 1.341611 | 1 | 4.94585     | -3.24042 | -0.12239 |
| 6  | 8.139585    | -1.04327 | 0.07275  | 1 | 7.207277    | -4.31631 | -0.02915 |
| 6  | 6.869056    | -0.44655 | 0.014233 | 1 | 9.247295    | -2.89077 | 0.099975 |
| 6  | 6.748964    | 1.029068 | 0.035884 | 6 | 4.336085    | -0.65343 | -0.11457 |
| 6  | 5.394437    | 1.617023 | -0.0578  | 6 | 5.714437    | -1.24789 | -0.05801 |
| 6  | 5.30931     | 3.008889 | -0.03951 | 6 | 5.850275    | -2.64558 | -0.07056 |
| 6  | 4.057302    | 3.636829 | -0.13237 | 6 | 7.113662    | -3.23419 | -0.01636 |
| 6  | 2.905011    | 2.882862 | -0.2591  | 6 | 8.2642      | -2.43136 | 0.055905 |
| 6  | 2.942948    | 1.453231 | -0.30278 | 6 | 4.218104    | 0.80491  | -0.16484 |

Coordinates of B3LYP/LANL2DZ optimized structure of  $[(\mathbf{L}_s)_2\text{Hg}^{2+}]$

| Z  | Coordinates |          |          | Z  | Coordinates |          |          |
|----|-------------|----------|----------|----|-------------|----------|----------|
|    | x           |          | x        |    | x           |          |          |
| 6  | -5.53906    | -2.79741 | 1.16945  | 6  | 3.653198    | 0.210653 | 2.249303 |
| 6  | -4.48841    | -2.39688 | 0.110222 | 6  | 4.614762    | 1.365964 | 1.862244 |
| 6  | -4.95635    | -1.20415 | -0.78163 | 8  | 5.63395     | 0.818065 | 0.950573 |
| 8  | -5.17658    | -0.08173 | 0.161218 | 6  | 6.452773    | -0.24344 | 1.562193 |
| 6  | -6.28028    | -0.30282 | 1.126016 | 6  | 5.489636    | -1.43861 | 1.794096 |
| 6  | -5.86984    | -1.52815 | 1.987896 | 8  | 2.706072    | 0.740197 | 3.24839  |
| 8  | -3.93871    | -3.579   | -0.56792 | 8  | 4.652668    | -1.22385 | 4.176144 |
| 8  | -6.6873     | -3.61032 | 0.695924 | 8  | 6.09851     | -2.72221 | 2.20446  |
| 8  | -6.72775    | -1.86463 | 3.147589 | 6  | 7.582351    | -0.54645 | 0.594642 |
| 6  | -6.40325    | 0.97508  | 1.945681 | 8  | 7.004626    | -1.22642 | -0.58316 |
| 8  | -5.26606    | 1.049277 | 2.888134 | 7  | 3.941626    | 2.472303 | 1.236699 |
| 7  | -4.03579    | -0.83114 | -1.82833 | 6  | 5.277244    | -0.2635  | 4.959217 |
| 6  | -7.69481    | -3.24157 | -0.19988 | 8  | 5.63944     | 0.846389 | 4.547233 |
| 8  | -7.78255    | -2.14133 | -0.75365 | 6  | 5.434801    | -0.75465 | 6.37629  |
| 6  | -8.63399    | -4.39983 | -0.41442 | 6  | 7.875924    | -1.56343 | -1.60388 |
| 6  | -4.63727    | 2.265992 | 3.086659 | 8  | 9.111307    | -1.5047  | -1.46164 |
| 8  | -5.05353    | 3.334454 | 2.612243 | 6  | 7.146004    | -1.99092 | -2.85424 |
| 6  | -3.39943    | 2.109091 | 3.94069  | 6  | 7.067873    | -2.81065 | 3.189573 |
| 6  | -8.10931    | -1.94532 | 3.082811 | 8  | 7.534285    | -1.82817 | 3.789102 |
| 8  | -8.77017    | -1.65786 | 2.073017 | 6  | 7.48653     | -4.24558 | 3.406183 |
| 6  | -8.68551    | -2.39768 | 4.405746 | 6  | 1.356379    | 0.685957 | 2.996095 |
| 6  | -4.51084    | -4.13364 | -1.69627 | 8  | 0.883632    | 0.201457 | 1.94736  |
| 8  | -5.52024    | -3.6653  | -2.25211 | 6  | 0.534161    | 1.304922 | 4.093252 |
| 6  | -3.74425    | -5.34805 | -2.15569 | 6  | 3.122989    | 2.533091 | 0.117355 |
| 6  | -2.70047    | -0.46916 | -1.80543 | 7  | 2.498465    | 3.638705 | -0.10503 |
| 7  | -2.0966     | -0.41674 | -2.94826 | 16 | 2.976214    | 1.040783 | -0.99974 |
| 16 | -1.99592    | -0.00268 | -0.15503 | 6  | -3.2339     | 6.725324 | -0.91667 |
| 6  | 3.24684     | -4.43081 | -2.95457 | 6  | -2.03524    | 5.991748 | -1.03398 |
| 6  | 2.24342     | -3.44728 | -3.09066 | 6  | -1.25592    | 6.067271 | -2.30021 |
| 6  | 2.569378    | -2.15109 | -3.74418 | 6  | 0.070341    | 5.377501 | -2.34173 |
| 6  | 1.49906     | -1.10699 | -3.80537 | 6  | 0.855262    | 5.528865 | -3.49548 |
| 6  | 1.826651    | 0.111832 | -4.41385 | 6  | 2.136466    | 4.946847 | -3.54978 |
| 6  | 0.85894     | 1.132785 | -4.51155 | 6  | 2.648514    | 4.260043 | -2.4444  |
| 6  | -0.42177    | 0.939205 | -3.99634 | 6  | 1.88319     | 4.1161   | -1.25106 |
| 6  | -0.79736    | -0.28725 | -3.35751 | 6  | 0.547236    | 4.625293 | -1.22652 |
| 6  | 0.187464    | -1.33963 | -3.26514 | 6  | -0.34285    | 4.366206 | -0.06936 |
| 6  | -0.16361    | -2.68557 | -2.74037 | 6  | -1.59498    | 5.177094 | 0.040878 |
| 6  | 0.93525     | -3.70135 | -2.61769 | 6  | -2.36648    | 5.110162 | 1.218318 |
| 6  | 0.646611    | -4.94017 | -2.00699 | 6  | -3.55317    | 5.84949  | 1.33346  |
| 6  | 1.647834    | -5.91331 | -1.86951 | 6  | -3.98853    | 6.659591 | 0.264463 |
| 6  | 2.952852    | -5.65888 | -2.34537 | 8  | -0.09155    | 3.46018  | 0.783929 |

|   |          |          |          |    |          |          |          |
|---|----------|----------|----------|----|----------|----------|----------|
| 8 | -1.33842 | -3.01503 | -2.41496 | 8  | -1.68297 | 6.717497 | -3.29296 |
| 8 | 3.718847 | -1.94027 | -4.22216 | 80 | 0.483219 | 0.525057 | -0.57733 |
| 6 | 4.307978 | -1.10157 | 2.738493 | 1  | -5.07229 | -3.5186  | 1.847914 |
| 1 | -2.86406 | -5.50826 | -1.53283 | 1  | -3.62131 | -2.03668 | 0.673157 |
| 1 | 4.239585 | -4.21233 | -3.33496 | 1  | -4.93996 | -1.23976 | 2.487375 |
| 1 | 2.830302 | 0.241848 | -4.8028  | 1  | -5.89805 | -1.43722 | -1.27196 |
| 1 | 1.110266 | 2.079456 | -4.98201 | 1  | -7.32622 | 0.96336  | 2.534897 |
| 1 | -1.18043 | 1.712466 | -4.07587 | 1  | -6.38973 | 1.852272 | 1.292319 |
| 1 | -0.36314 | -5.11334 | -1.64969 | 1  | -7.21567 | -0.48185 | 0.593627 |
| 1 | 1.419947 | -6.8649  | -1.3956  | 1  | -4.35674 | -1.0516  | -2.76802 |
| 1 | 3.726822 | -6.41492 | -2.23993 | 1  | -8.29897 | -4.9555  | -1.30054 |
| 1 | 3.565446 | -1.90187 | 2.659283 | 1  | -9.64053 | -4.01894 | -0.60692 |
| 1 | 3.10948  | -0.05483 | 1.33836  | 1  | -8.63308 | -5.07364 | 0.445605 |
| 1 | 5.07074  | -1.6807  | 0.812908 | 1  | -2.52275 | 2.29137  | 3.305911 |
| 1 | 5.101014 | 1.743095 | 2.762397 | 1  | -3.33973 | 1.105231 | 4.36556  |
| 1 | 8.34466  | -1.18459 | 1.052824 | 1  | -3.40611 | 2.859534 | 4.740481 |
| 1 | 8.054353 | 0.386466 | 0.270648 | 1  | -9.31391 | -1.59846 | 4.818006 |
| 1 | 6.885623 | 0.113258 | 2.501423 | 1  | -7.89617 | -2.64781 | 5.116419 |
| 1 | 4.022677 | 3.369067 | 1.708235 | 1  | -9.33142 | -3.26709 | 4.238656 |
| 1 | 4.773219 | -0.17447 | 7.032332 | 1  | -3.43255 | -5.1986  | -3.1951  |
| 1 | 6.465661 | -0.58014 | 6.700207 | 1  | -4.40171 | -6.22543 | -2.12163 |
| 1 | 5.190086 | -1.81493 | 6.457392 | 1  | 1.171409 | 1.721518 | 4.87455  |
| 1 | 7.443194 | -1.33466 | -3.68065 | 1  | -3.55284 | 7.329263 | -1.76072 |
| 1 | 6.060237 | -1.9513  | -2.74636 | 1  | 0.453699 | 6.103968 | -4.32338 |
| 1 | 7.45625  | -3.00844 | -3.12737 | 1  | 2.746517 | 5.055834 | -4.44335 |
| 1 | 8.548625 | -4.35272 | 3.154459 | 1  | 3.656272 | 3.856073 | -2.46077 |
| 1 | 6.89384  | -4.92644 | 2.793379 | 1  | -2.02103 | 4.475068 | 2.027206 |
| 1 | 7.374582 | -4.49878 | 4.466696 | 1  | -4.14539 | 5.790162 | 2.241167 |
| 1 | -0.13738 | 0.551034 | 4.520623 | 1  | -4.9147  | 7.221426 | 0.352245 |
| 1 | -0.08117 | 2.095377 | 3.647854 |    |          |          |          |
